# Supplementary material for: Synthesis of Iron(II) Clathrochelate-Based Poly(vinylene sulfide) with Tetraphenylbenzene Bridging Units and Their Selective Oxidation into Their Corresponding Poly(vinylene sulfone) Copolymers: Promising Materials for Iodine Capture
Source: MDPI journal article supplement (doi:10.3390/polym14183727), 2022-09-07
Supplement: s1 [file s1]

# Synthesis of Iron(II) Clathrochelate-Based Poly(vinylene sulfide) with Tetraphenylbenzene Bridging Units and their Selective Oxidation into their Corresponding Poly(vinylene sulfone) Copolymers: Promising Materials for Iodine Capture

Noorullah Baig<sup>a,b</sup>, Suchetha Shetty<sup>a,b</sup>, Sameh S. Habib<sup>c</sup>, Ali A. Husain<sup>c</sup>, Saleh Al-Mousawi<sup>\*c</sup>, Bassam Alameddine<sup>\*a,b</sup>

<sup>a</sup> Department of Mathematics and Natural Sciences, Gulf University for Science and Technology, Kuwait.

<sup>b</sup> Functional Materials Group – CAMB, GUST, Kuwait.

<sup>c</sup> Department of Chemistry, University of Kuwait, Kuwait.

Tel: +965 2530 7476.

*E-mail address:* salehalmousawi@hotmail.com (S.A.-M.); alameddine.b@gust.edu.kw (B.A.)

## Contents

|                                                                         |                |
|-------------------------------------------------------------------------|----------------|
| Synthesis of <b>2</b> & <b>3</b>                                        | (i), (ii)      |
| <sup>1</sup> H NMR spectrum of <b>3</b> , <b>TBM</b> , & <b>CTP1,4</b>  | Figure S1-S4   |
| <sup>13</sup> C NMR spectrum of <b>3</b> , <b>TBM</b> , & <b>CTP1,4</b> | Figure S5-S8   |
| GPC of <b>CTP4</b>                                                      | Figure S9      |
| EI-HRMS of <b>3</b> , <b>TBM</b>                                        | Figure S10-S11 |
| Comparative FTIR of <b>3</b> and <b>TBM</b>                             | Figure S12     |
| FTIR of <b>CTP2-6</b>                                                   | Figure S13-S17 |
| XPS spectra of copolymer <b>CTP1-2,4</b> & <b>CTP6</b>                  | Figure S18-S21 |
| Kinetic modelling of iodine adsorption by <b>CTP1</b> & <b>CTP2</b>     | Figure S22-S23 |
| Gravimetric iodine adsorption and desorption of <b>CTP5</b>             | Figure S24     |

---

<sup>\*†</sup>Corresponding author. *E-mail address:* salehalmousawi@hotmail.com (S.A.-M.);

alameddine.b@gust.edu.kw (B.A.)

**i). Synthesis of 2:**

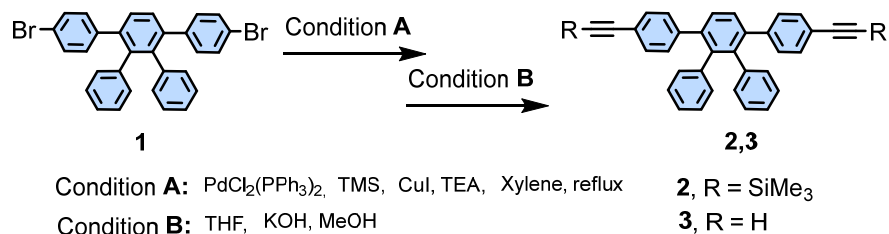

**Scheme S1:** Synthesis of **2&3**

3',6'-bis(4-bromo)-1,1':2',1''-terphenylbenzene **1** (2.0 gm, 3.7 mmol), bis(triphenyl phosphine)palladium (II) dichloride  $\text{PdCl}_2(\text{PPh}_3)_2$  (0.3 gm, 0.43mmol), copper (I) iodide CuI (0.14 gm, 0.74 mmol) and triphenyl phosphine  $\text{PPh}_3$  (2.0 gm, 7.6 mmol) were dissolved in (3:1 volume ratio) triethylamine: xylene. Ethynyltrimethylsilane TMSA (6 gm, 61.2 mmol) was added, then kept for reflux 24 hours at 80-90°C with stirring which controlled by thin layer chromatography (TLC). The solvent was removed by evaporation under pressure. The product was purified by column chromatography (petroleum ether) to yield a yellowish precipitate; yield 75%; mp. 301-302 °C; *Anal.* Calcd for  $\text{C}_{40}\text{H}_{38}\text{Si}_2$ : C, 83.57; H, 6.66. Found: C, 83.56; H, 6.64; EI-HRMS:  $m/z = 574.2506$  ( $\text{MH}^+$ );  $\text{C}_{40}\text{H}_{38}\text{Si}_2$  requires:  $m/z = 574.2507$  ( $\text{MH}^+$ );  $^1\text{H}$  - NMR (600 MHz,  $\text{CDCl}_3$ ):  $\delta = 0.249$  (s, 18H,  $\text{CH}_3$ ), 6.78-6.80 (m, 4H, Ar-H), 6.94-6.95 (m, 6H, Ar-H), 7.06 (d, 4H,  $J = 8.4$  Hz, Ar-H), 7.27 (d, 4H,  $J = 8$  Hz, Ar-H), 7.49 (s, 2H, Ar-H);  $^{13}\text{C}$ -NMR (150 MHz,  $\text{CDCl}_3$ ):  $\delta = 142.32, 140.64, 140.58, 139.62, 131.61, 131.46, 129.90, 129.46, 127.27, 126.03, 121.04, 105.31, 94.48, 0.15$ .

**ii). Synthesis of 3:**

3',6'-bis(4-((trimethylsilane) ethynyl)-1,1':2',1''- terphenylbenzene **2** (1.6 gm, 2.8 mmol) was dissolved in THF (25 mL) and a solution of potassium hydroxide KOH (0.613 gm, 10.93 mmol) in methanol was added. The reaction was stirred at room temperature for 30 min which controlled by thin layer chromatography (TLC). The solvent was removed by evaporation under pressure. Desired product was isolated by column chromatography (petroleum ether) to yield a yellowish precipitate; yield 94.41%; mp. Up 400 °C; *Anal.* Calcd for C<sub>34</sub>H<sub>22</sub>: C, 94.85; H, 5.15. Found: C, 94.87; H, 5.16; EI-HRMS:  $m/z$  = 430.1722 (MH<sup>+</sup>); C<sub>34</sub>H<sub>22</sub> requires:  $m/z$  = 430.1736 (MH<sup>+</sup>); <sup>1</sup>H-NMR (600 MHz, DMSO-*d*<sub>6</sub>):  $\delta$  = 4.15 (s, 2H,  $\equiv$ C-H), 6.82-6.83 (m, 4H, Ar-H), 6.95-6.96 (m, 6H, Ar-H), 7.10 (d, 4H,  $J$ = 8.4 Hz, Ar-H), 7.26 (d, 4H,  $J$ = 8 Hz, Ar-H), 7.50 (s, 2H, Ar-H) ); <sup>13</sup>C-NMR (150 MHz, DMSO-*d*<sub>6</sub>):  $\delta$  = 141.89, 140.08, 139.87, 139.07, 131.00, 130.97, 129.75, 129.06, 126.97, 125.95, 119.67, 83.24, 81.01.

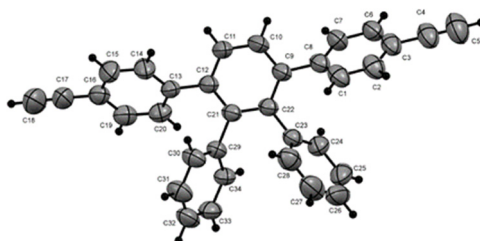

Single crystal structure of compound **3**

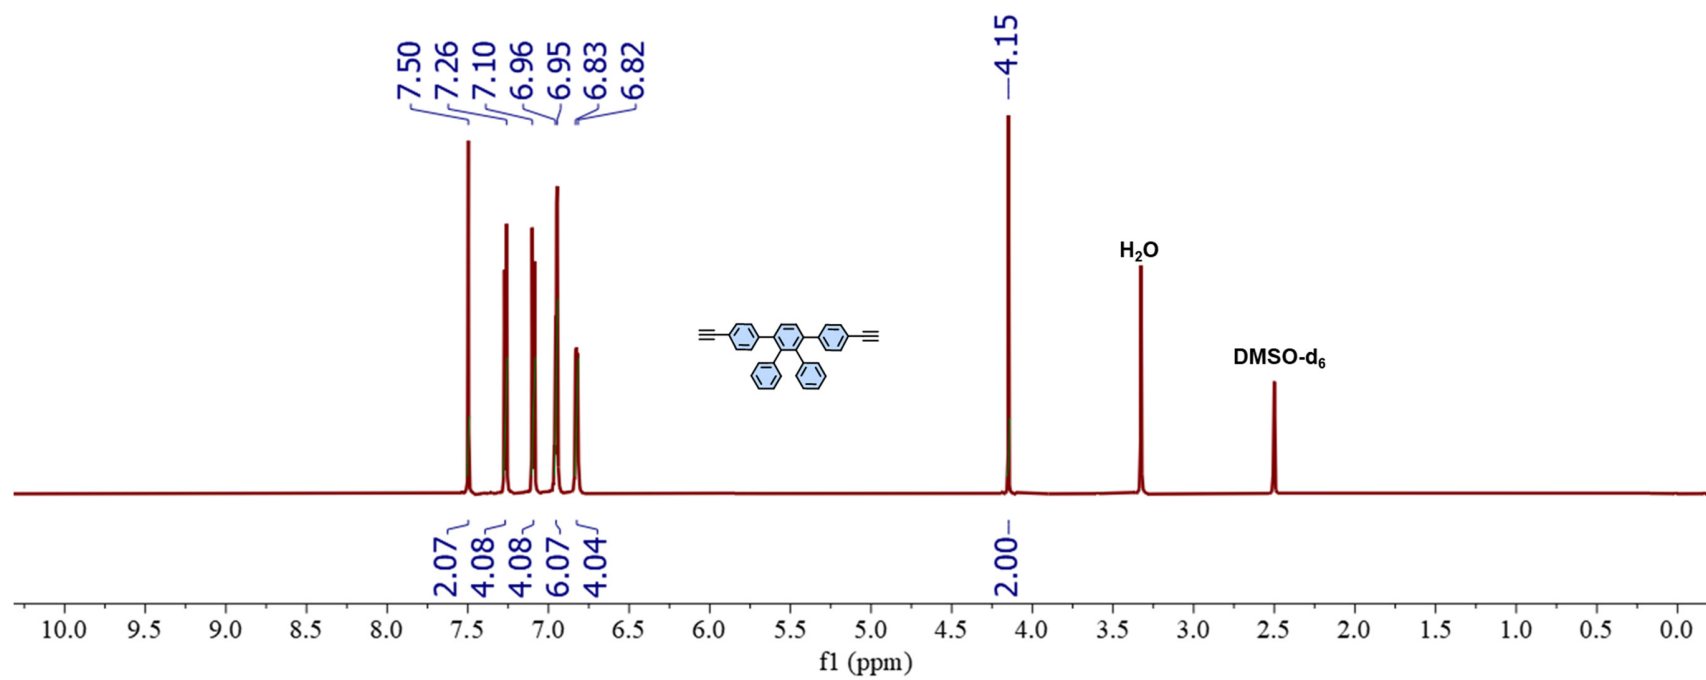

**Figure S1:** <sup>1</sup>H NMR spectrum of **3** (DMSO-d<sub>6</sub>, 600 MHz)

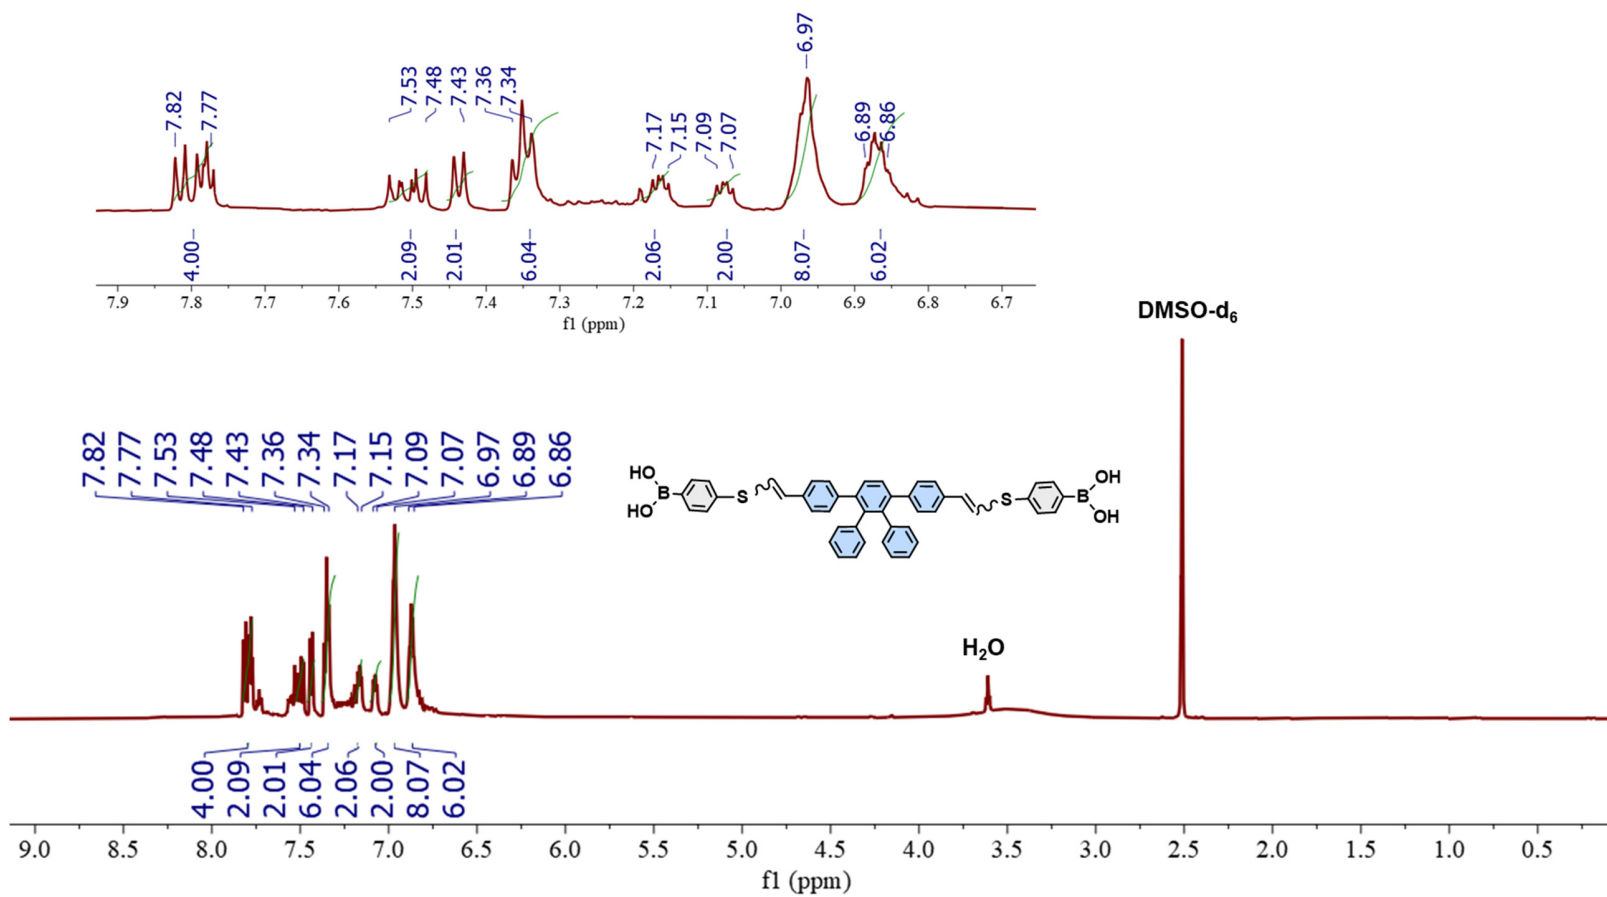

**Figure S2:**  $^1\text{H}$  NMR spectrum of **TBM** ( $\text{DMSO-d}_6$ , 600 MHz)

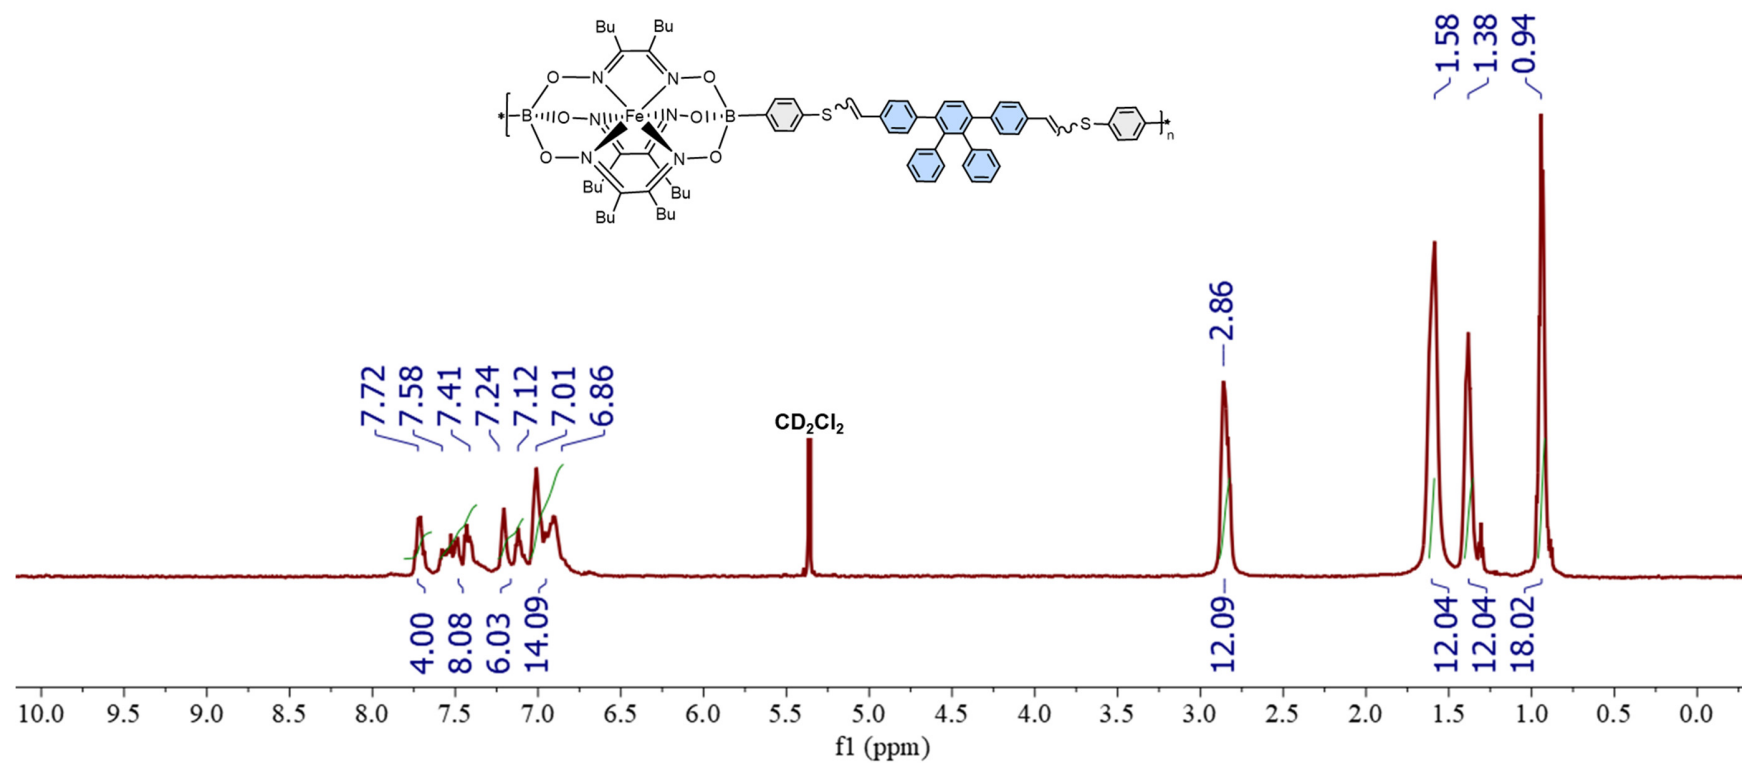

**Figure S3:**  $^1\text{H}$  NMR spectrum of **CTP1** ( $\text{CD}_2\text{Cl}_2$ , 600 MHz)

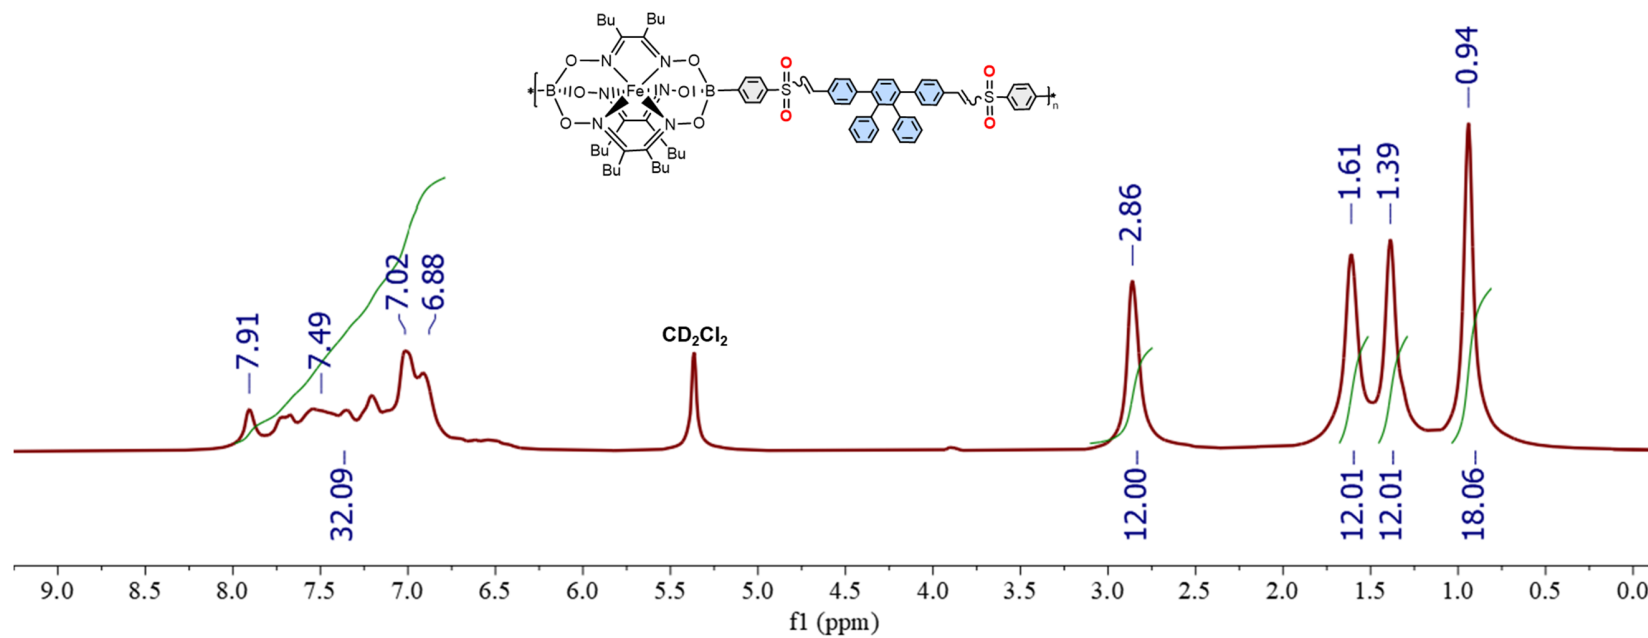

**Figure S4:**  $^1\text{H}$  NMR spectrum of **CTP4** ( $\text{CD}_2\text{Cl}_2$ , 600 MHz)

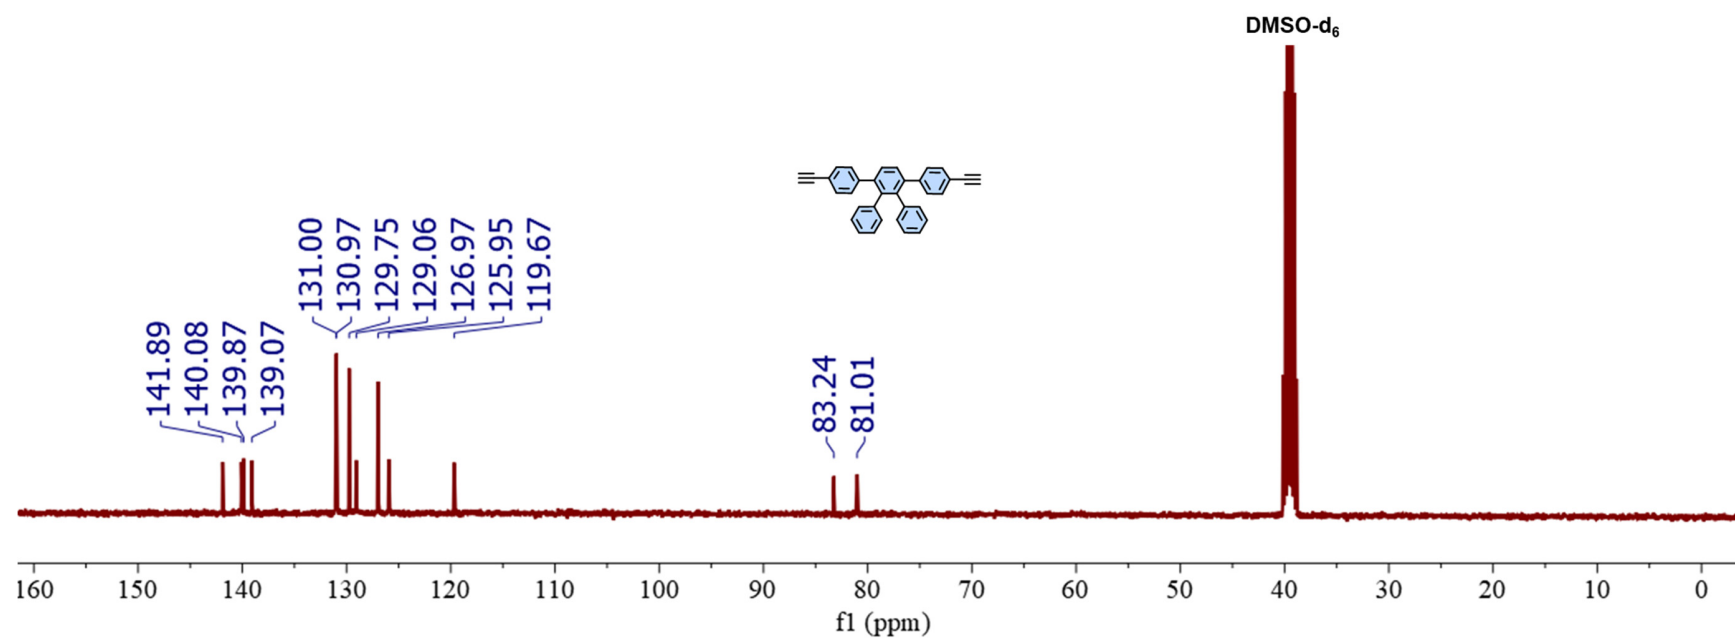

**Figure S5:**  $^{13}\text{C}$  NMR spectrum of **3** ( $\text{DMSO-d}_6$ , 150 MHz)



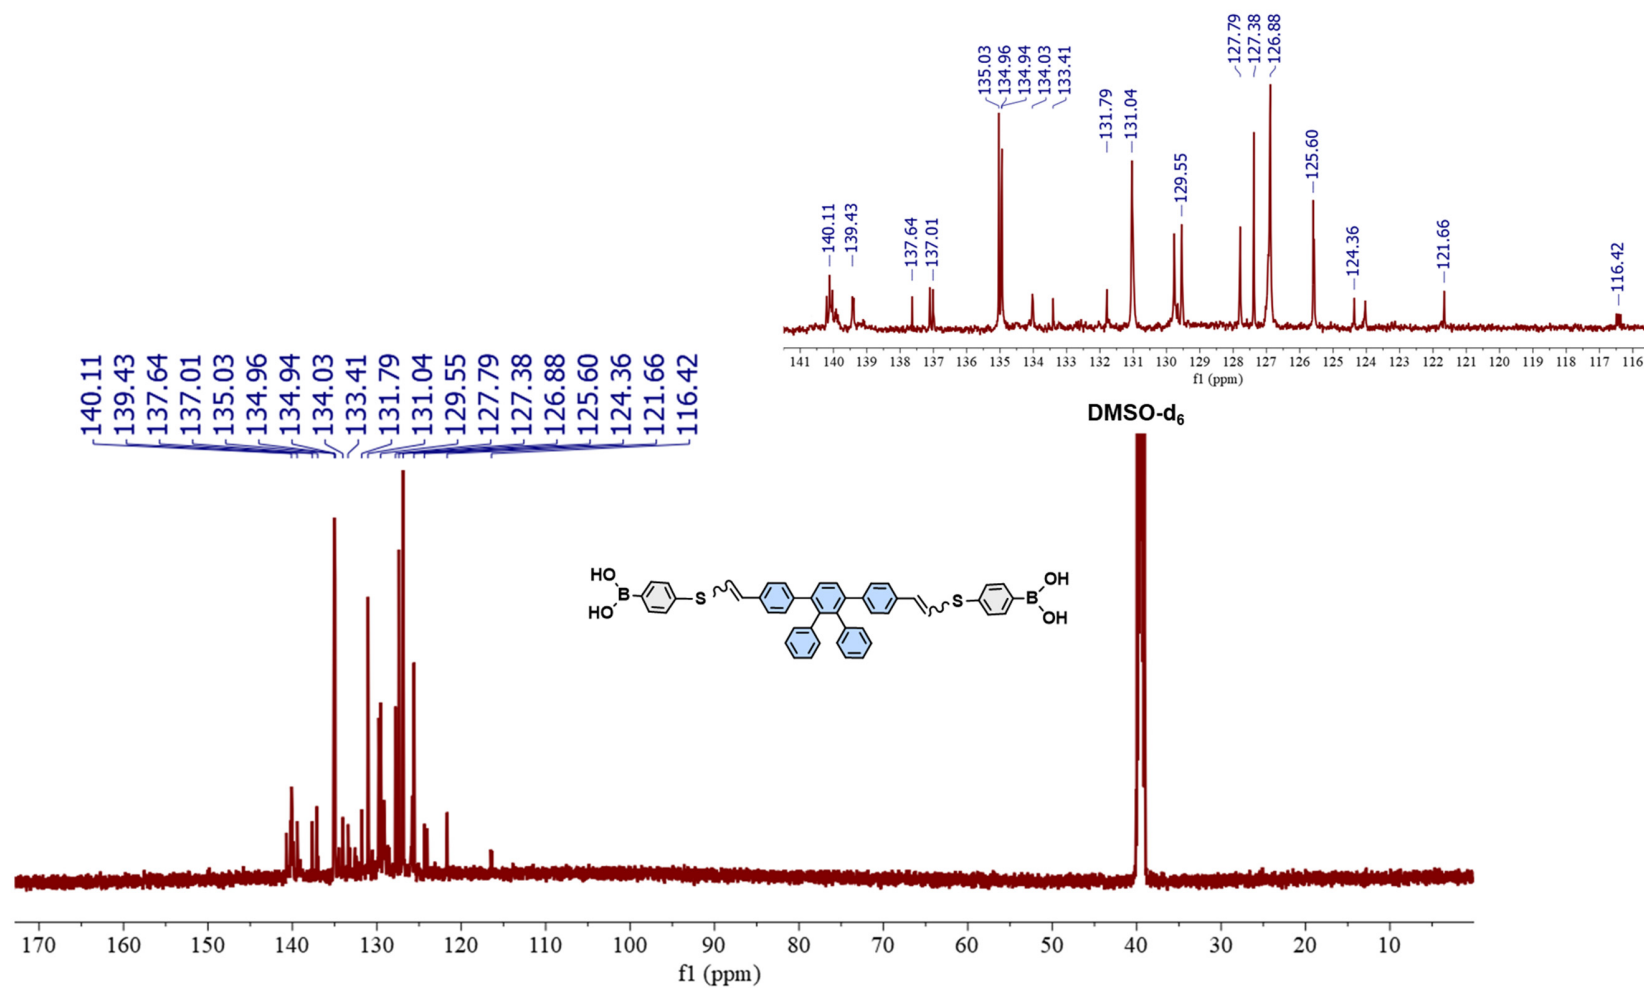

**Figure S6:**  $^{13}\text{C}$  NMR spectrum of **TBM** ( $\text{DMSO-d}_6$ , 150 MHz)

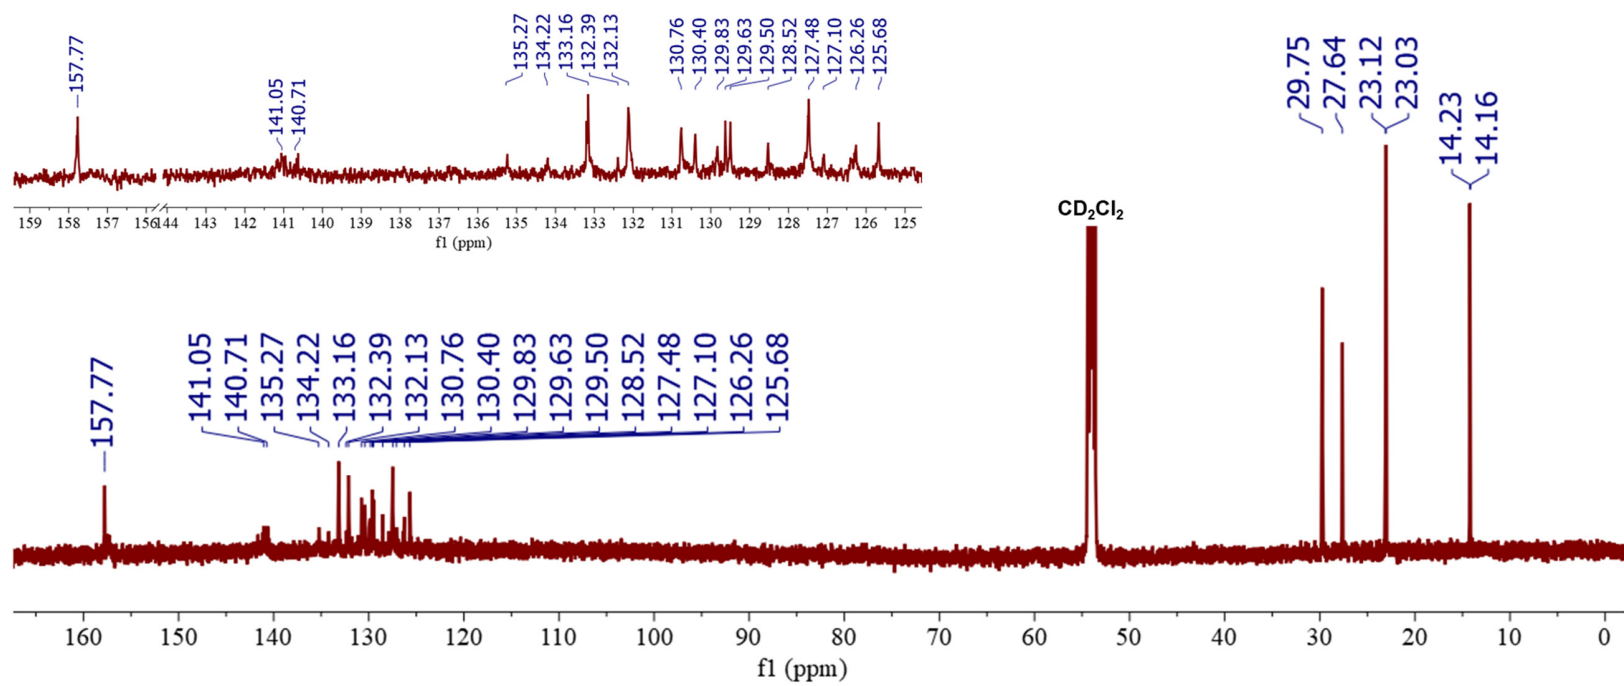

**Figure S7:**  $^{13}\text{C}$  NMR spectrum of **CTP1** ( $\text{CD}_2\text{Cl}_2$ , 150 MHz)

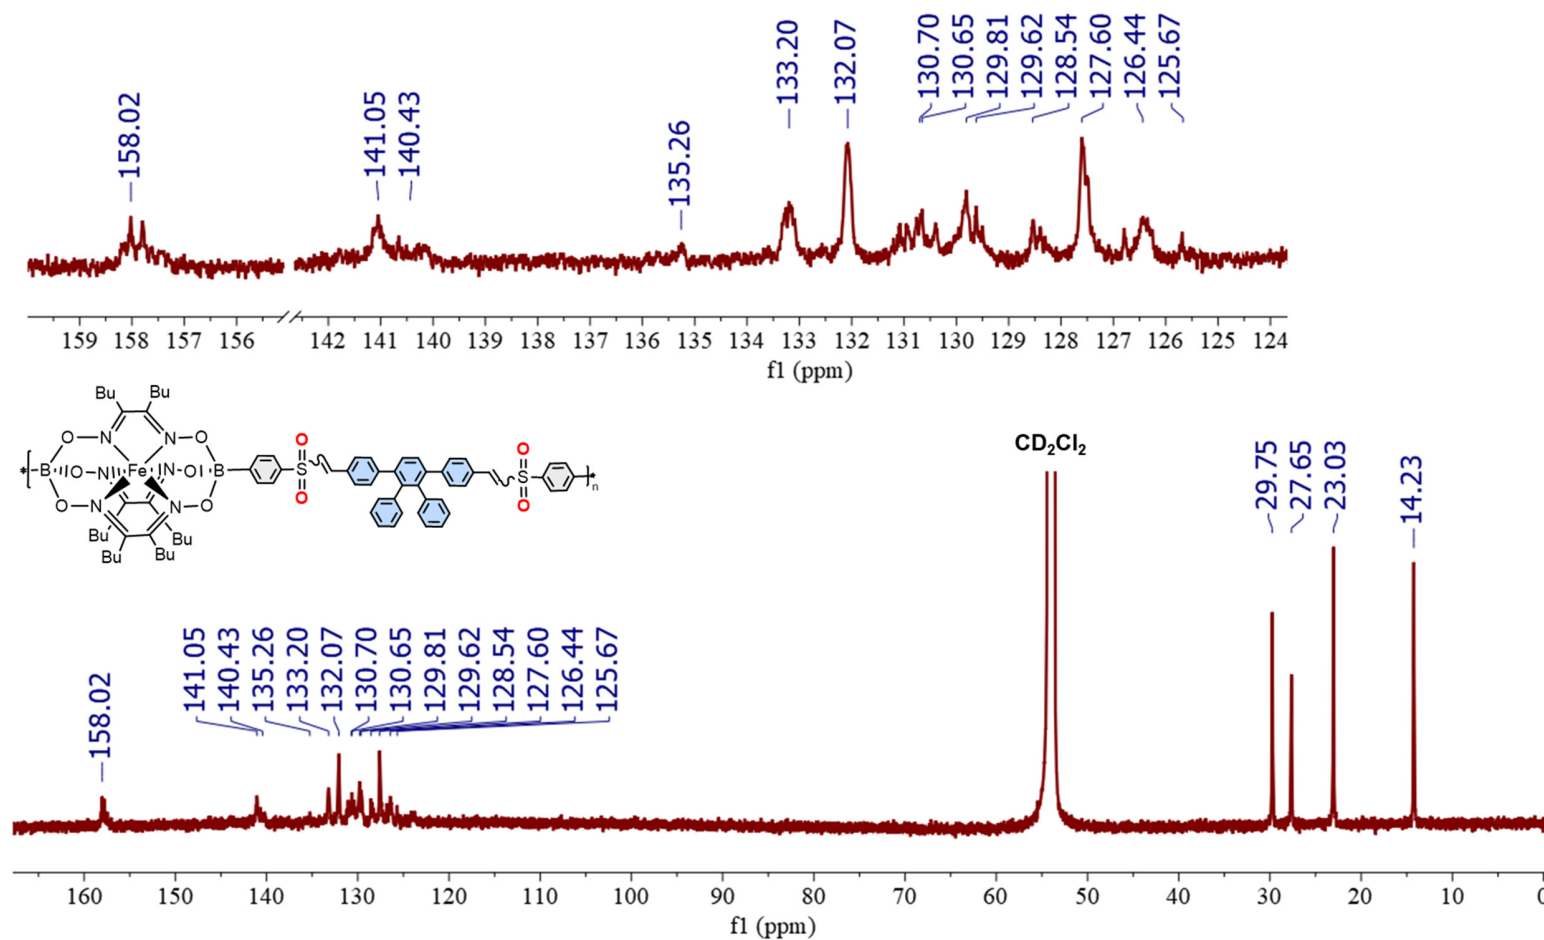

**Figure S8:**  $^{13}\text{C}$  NMR spectrum of **CTP4** ( $\text{CD}_2\text{Cl}_2$ , 150 MHz)

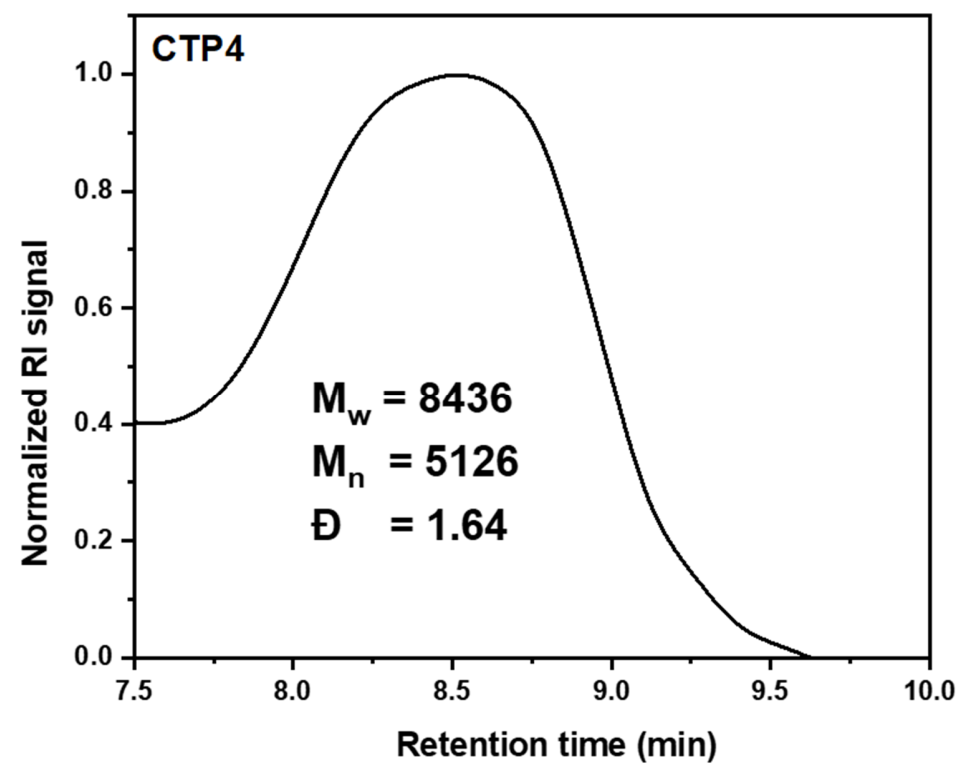

Figure S9: GPC of CTP4

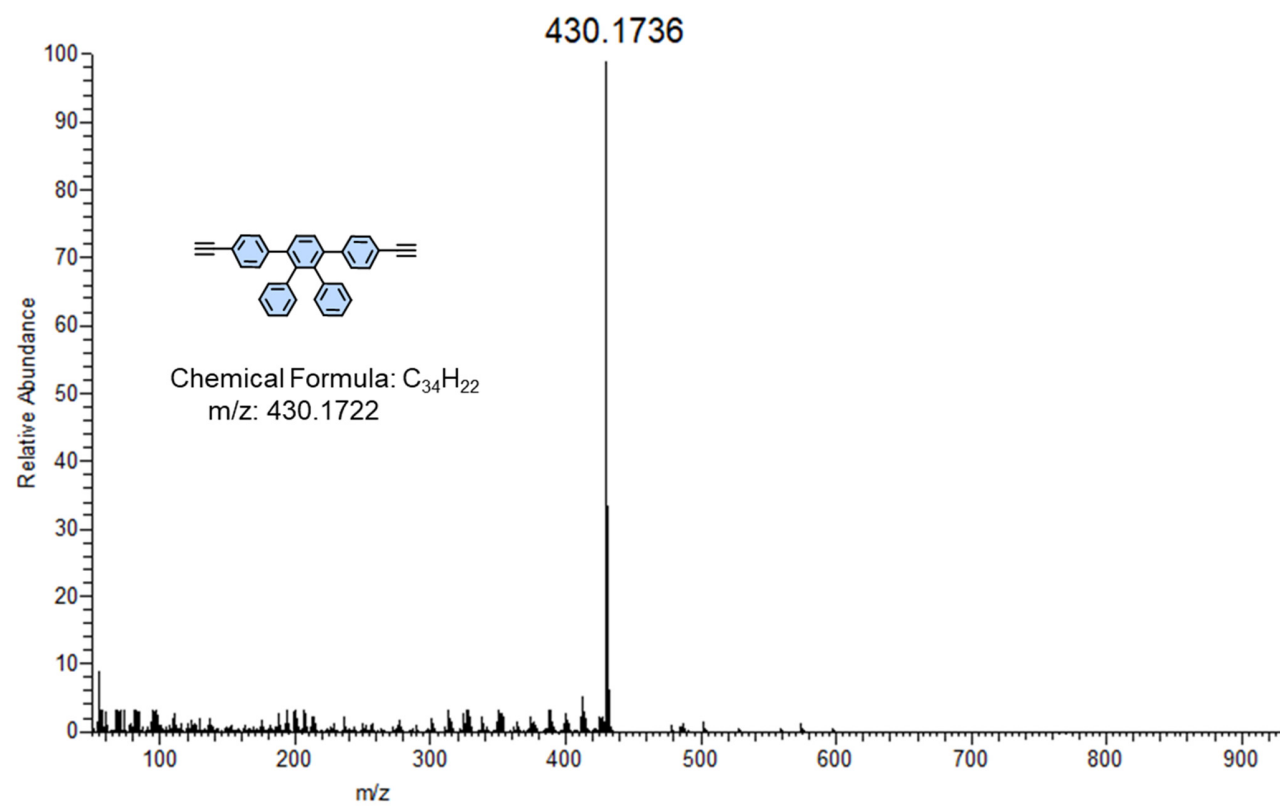

**Figure S10:** EI-HRMS of **3**



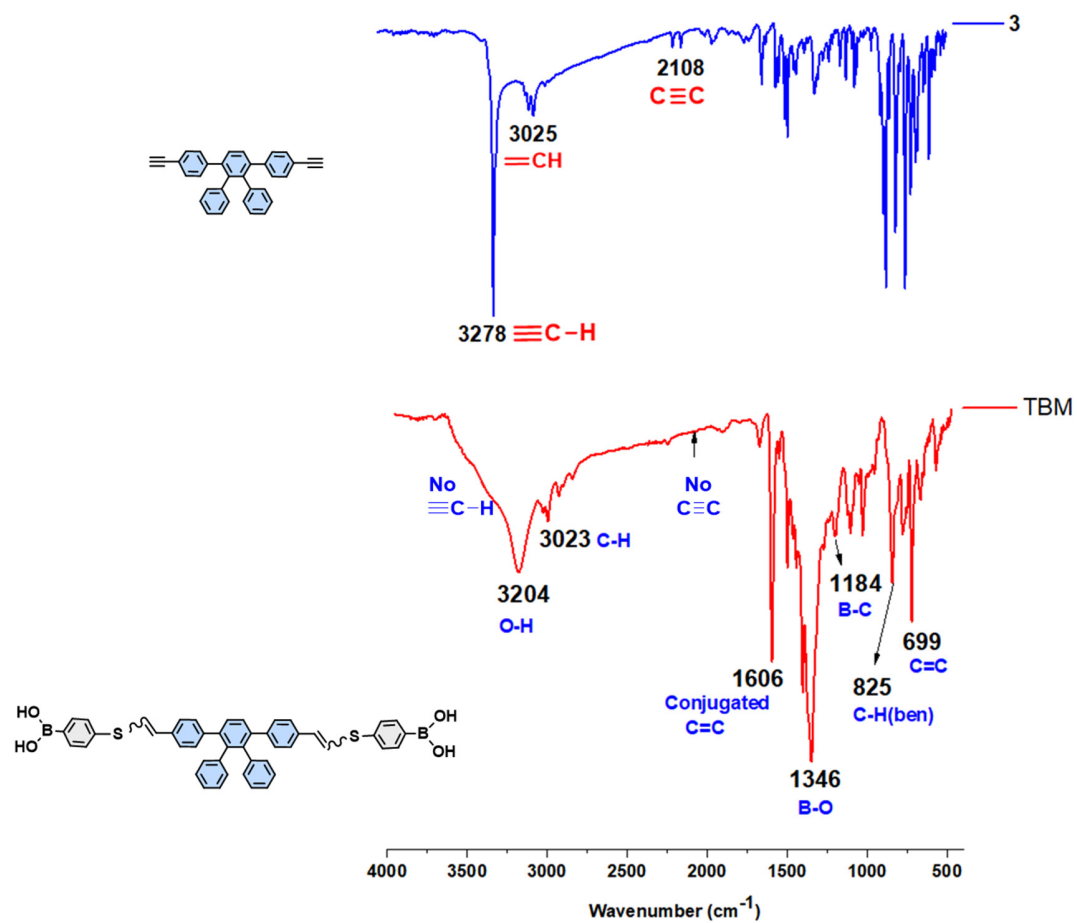

**Figure S12:** Comparative FT-IR spectrum of **3** (up) and **TBM** (down)





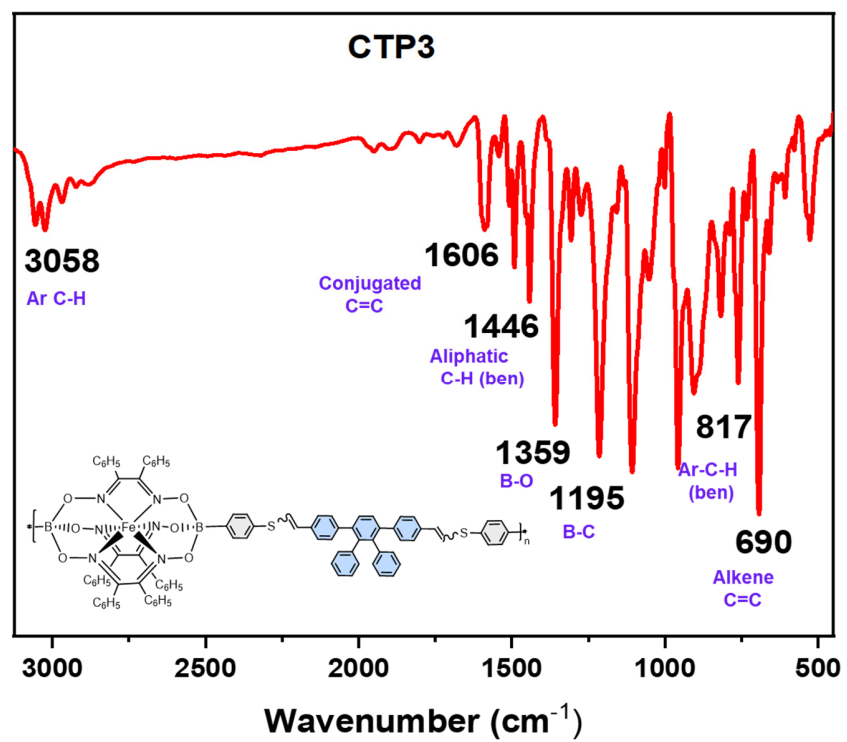

**Figure S14:** FT-IR spectrum of **CTP3**

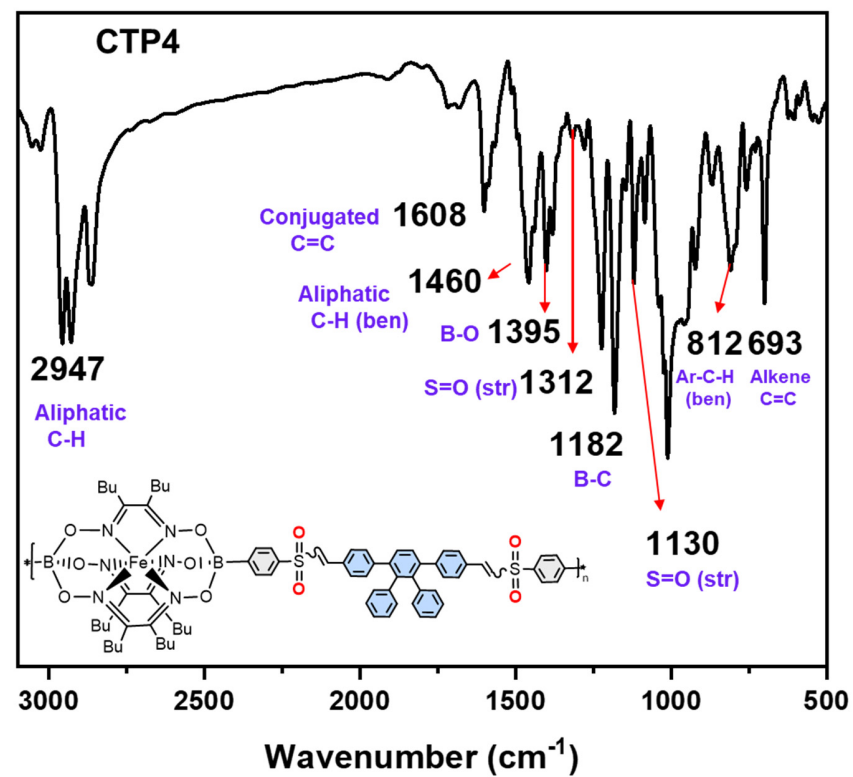

**Figure S15:** FT-IR spectrum of CTP4

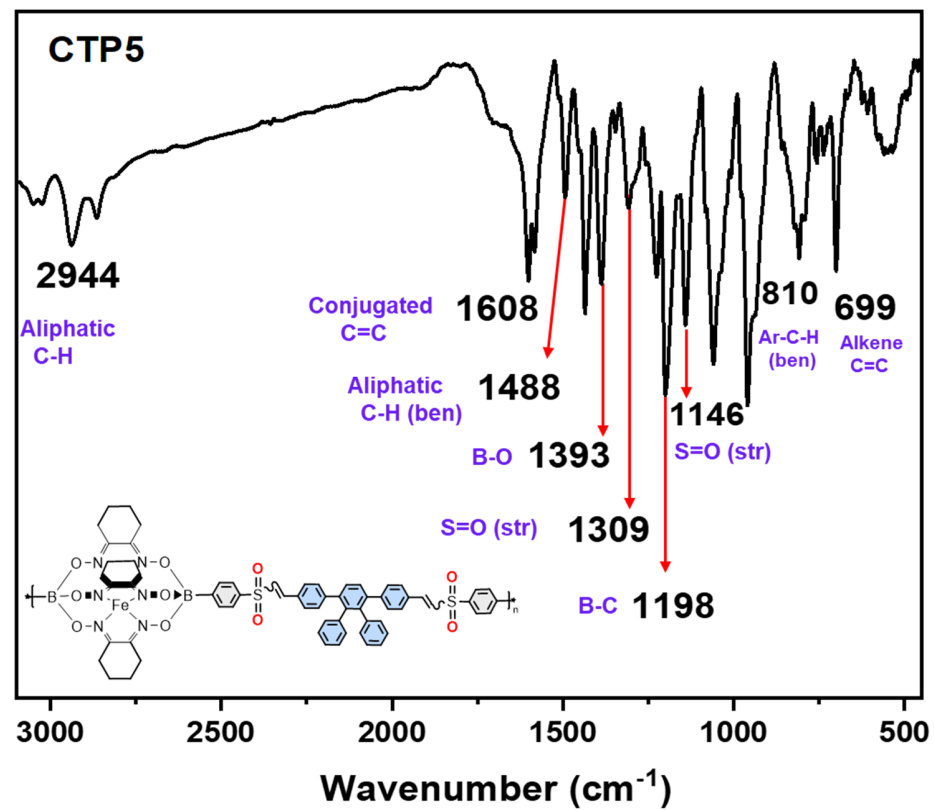

**Figure S16:** FT-IR spectrum of CTP5

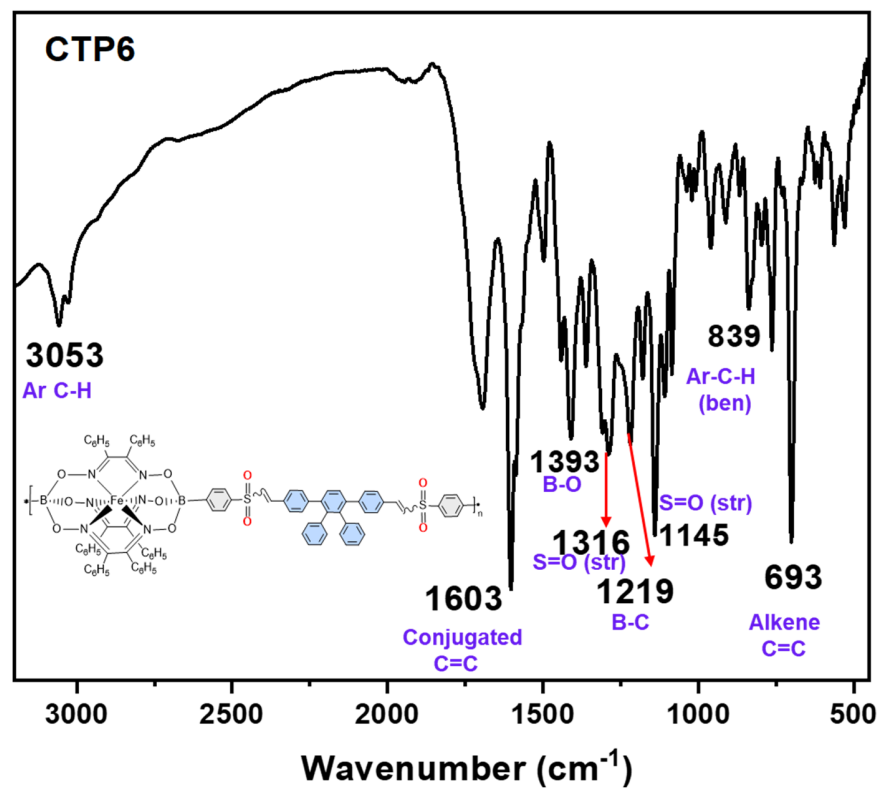

**Figure S17:** FT-IR spectrum of **CTP6**

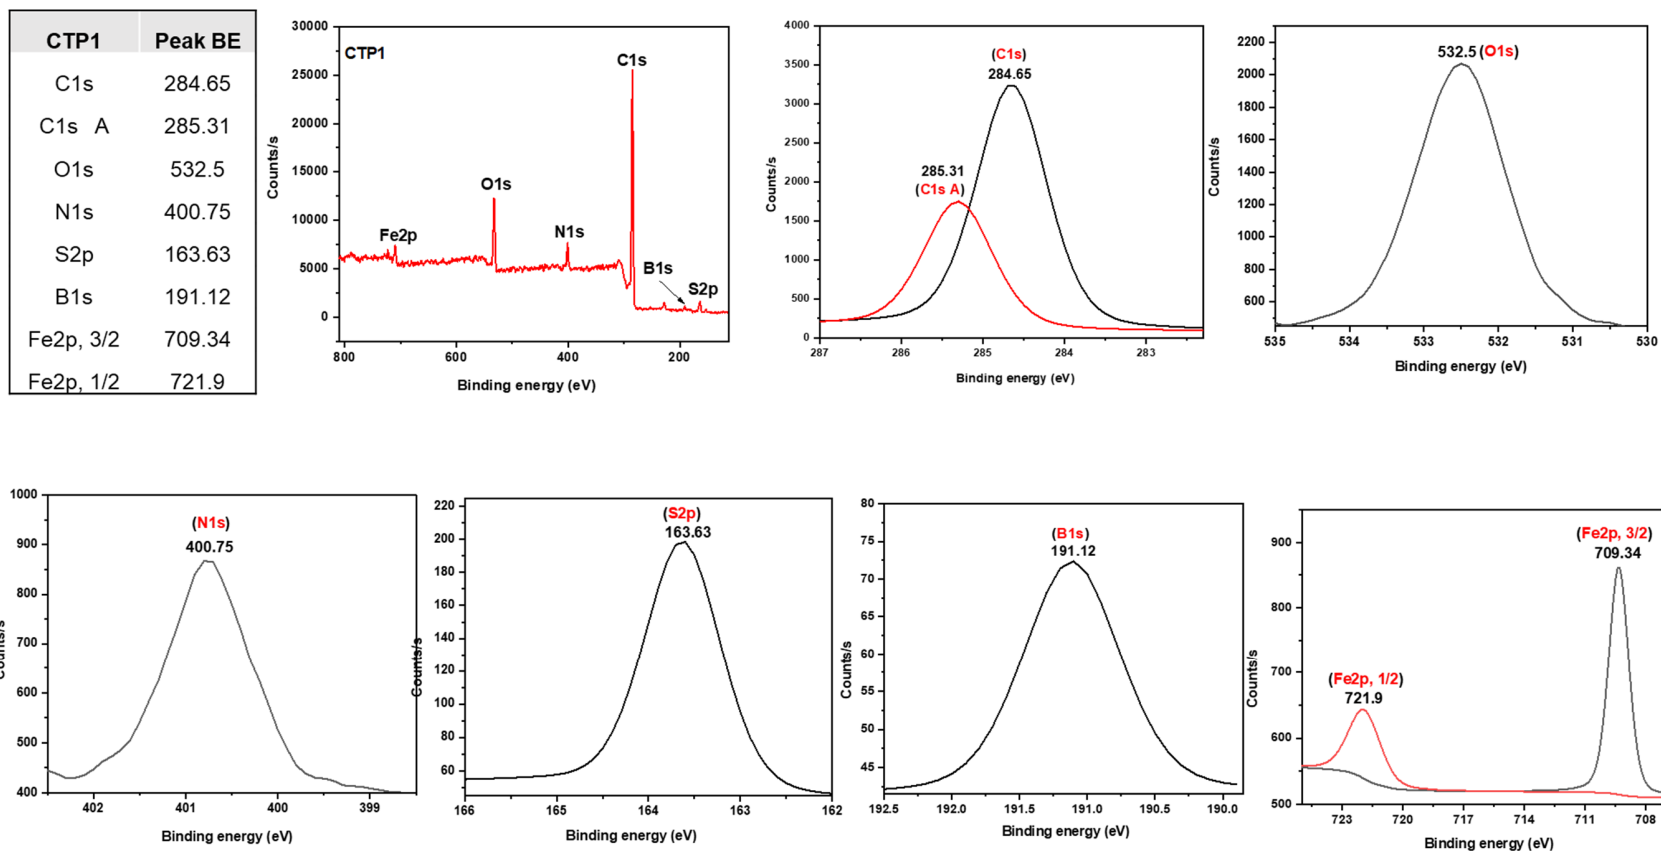

**Figure S18:** High-resolution XPS survey scan and spectra of C1s, O1s, N1s, S2p, B1s and Fe2p of copolymer **CTP1**

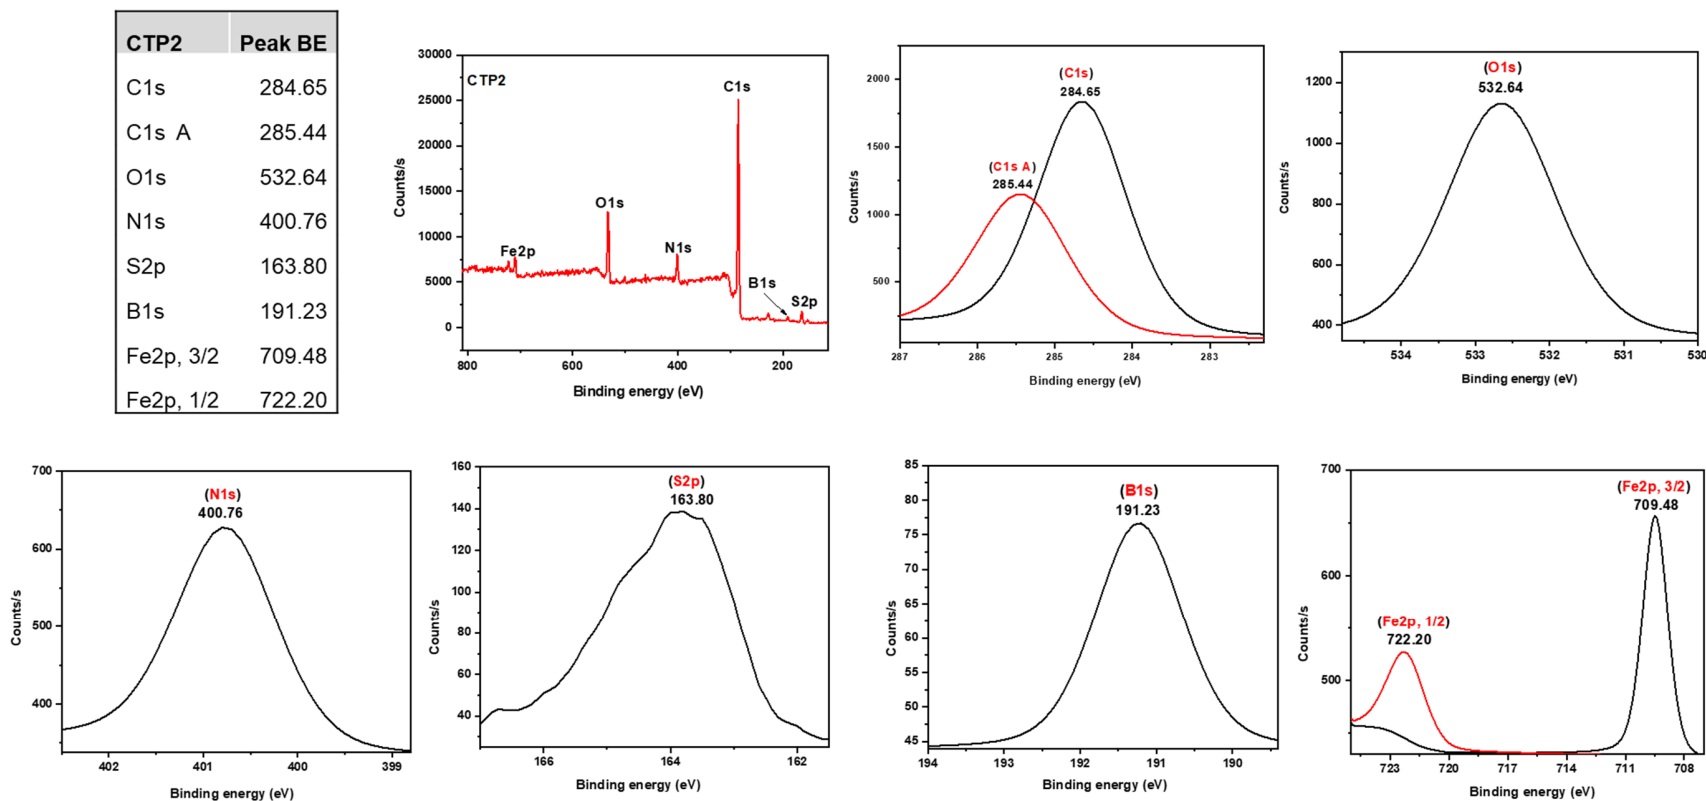

**Figure S19:** High-resolution XPS survey scan and spectra of C1s, O1s, N1s, S2p, B1s and Fe2p of copolymer CTP2

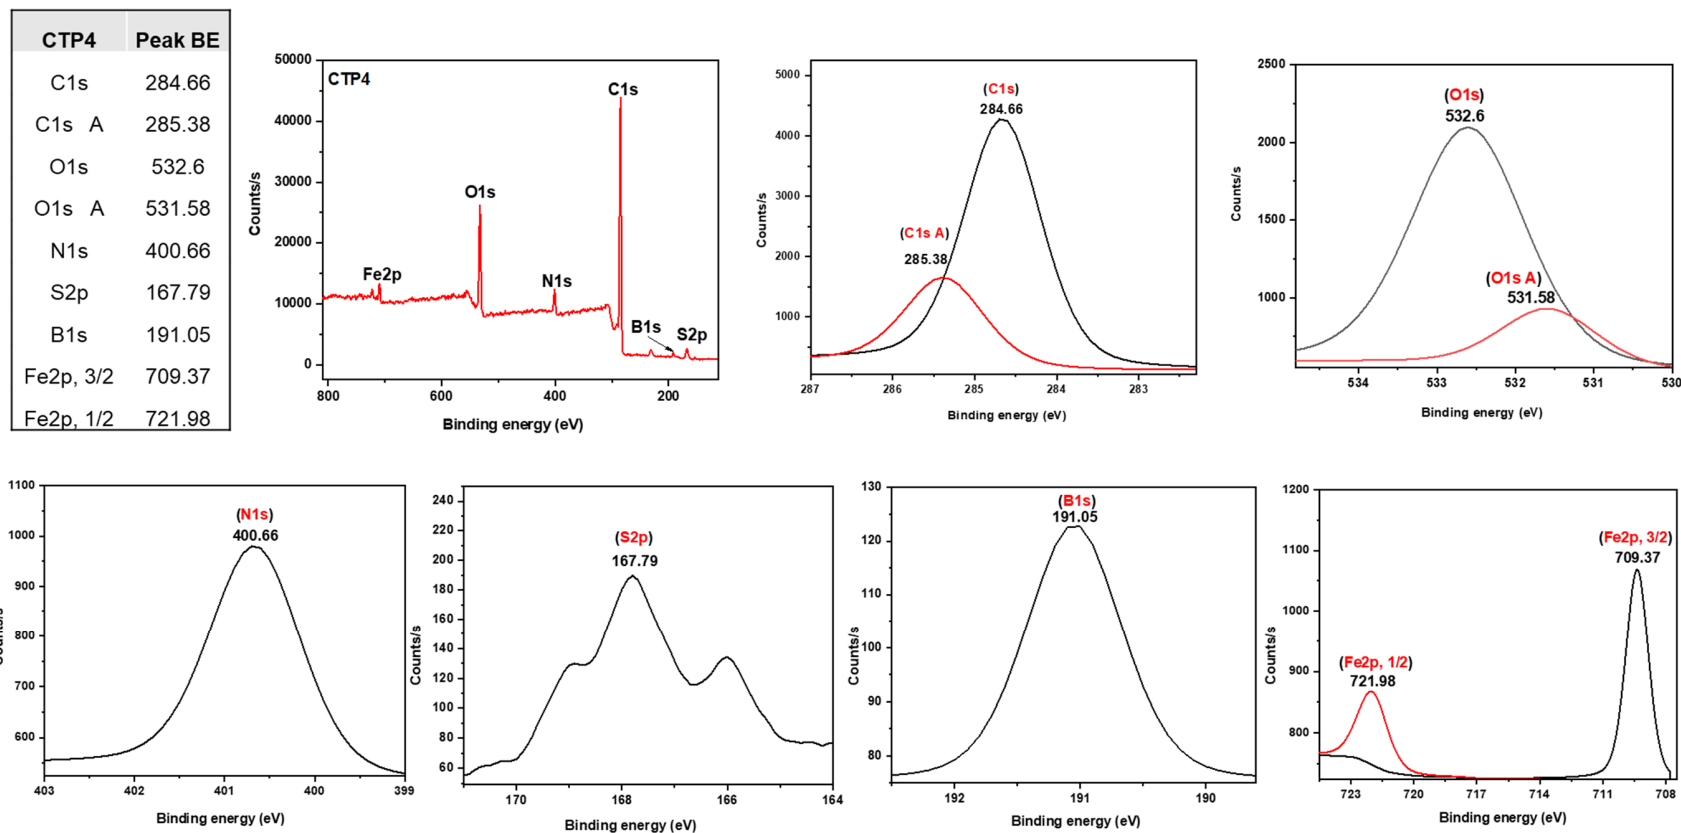

**Figure S20:** High-resolution XPS survey scan and spectra of C1s, O1s, N1s, S2p, B1s and Fe2p of copolymer **CTP4**

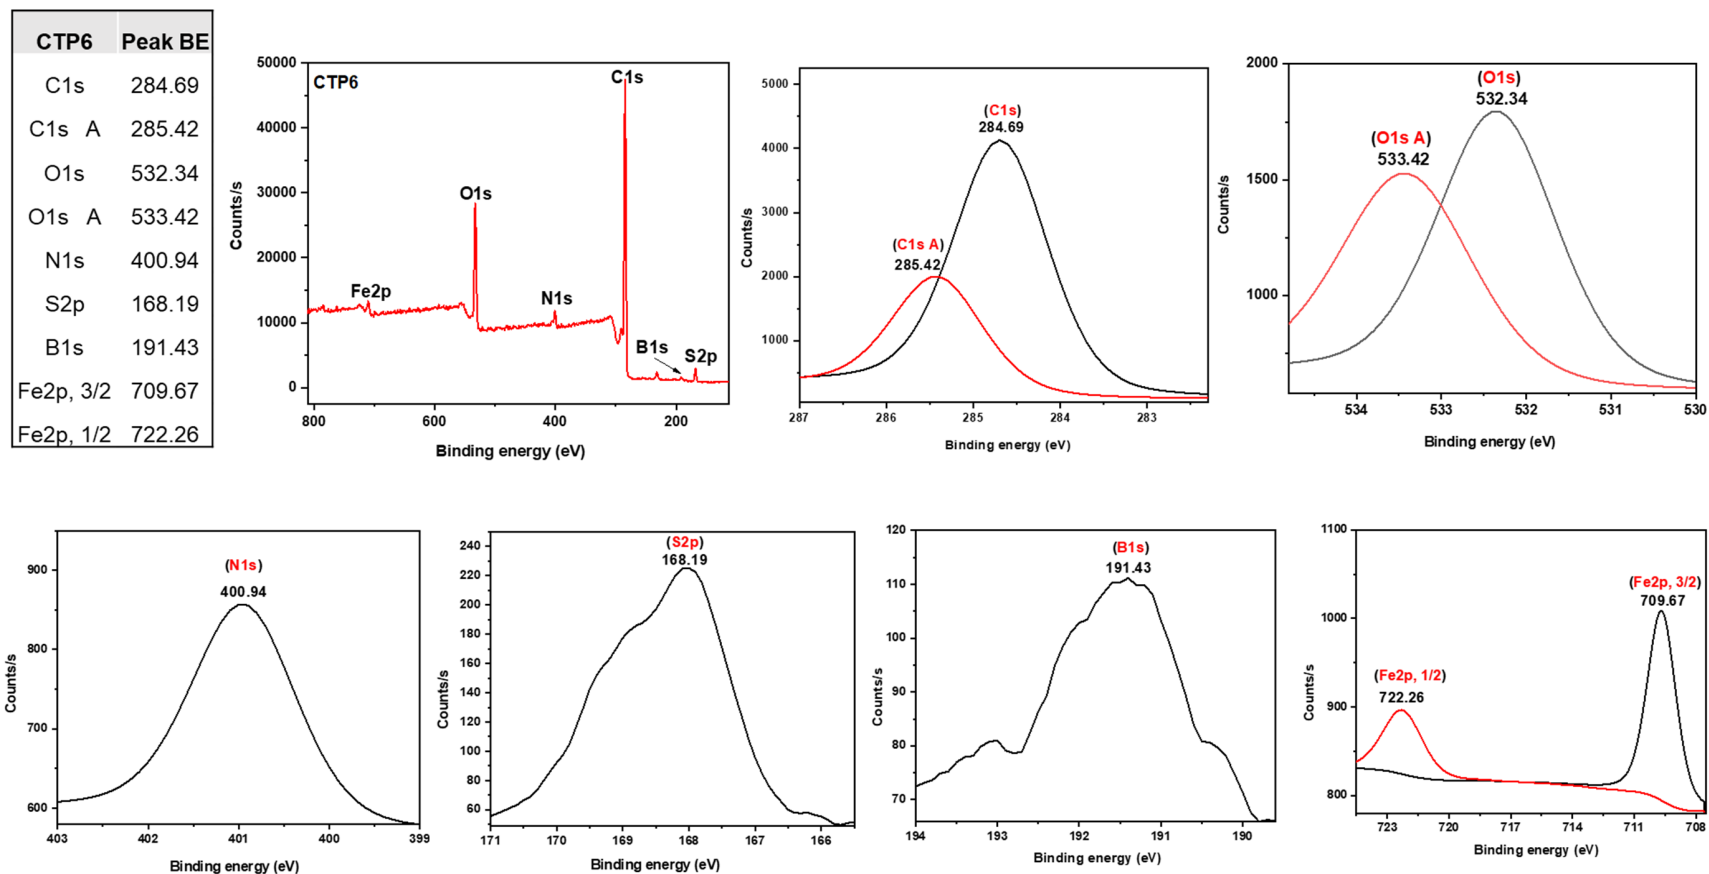

**Figure S21:** High-resolution XPS survey scan and spectra of C1s, O1s, N1s, S2p, B1s and Fe2p of copolymer **CTP6**



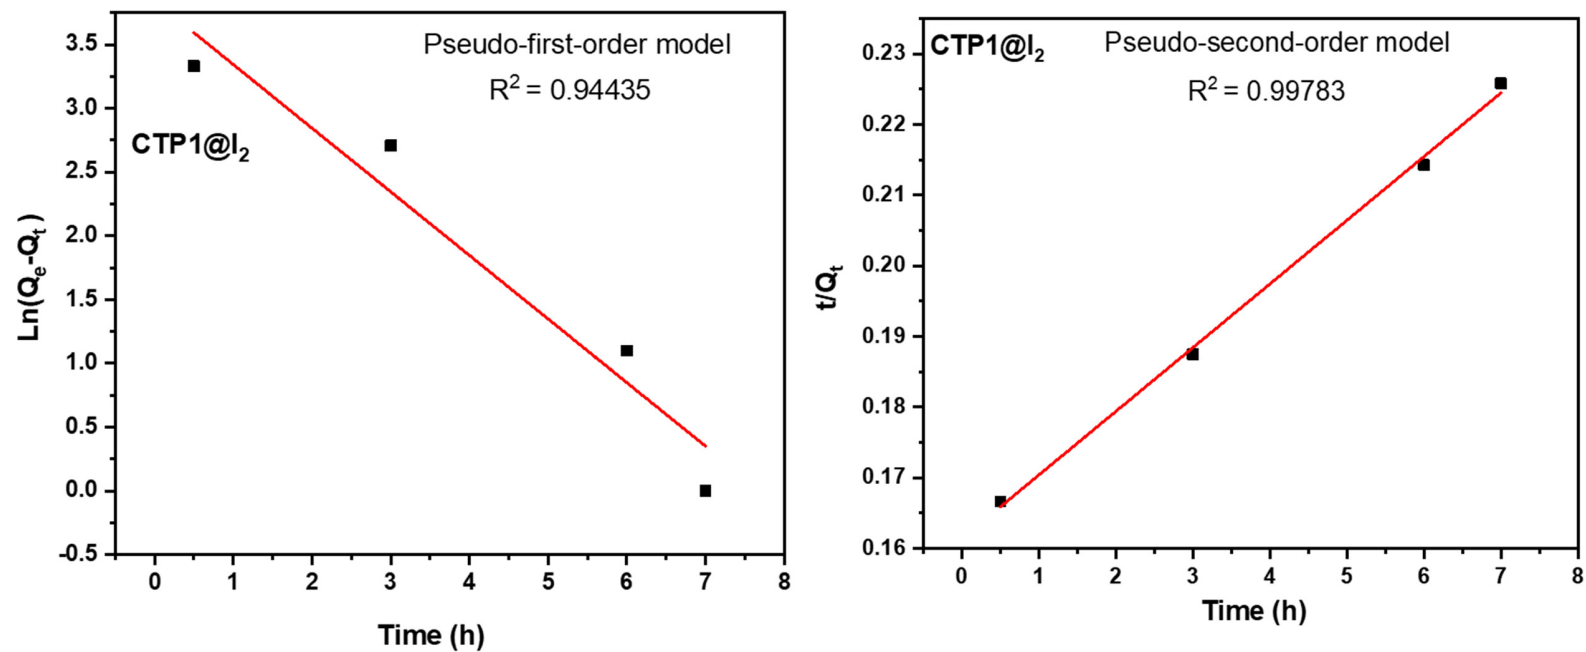

**Figure S22:** Kinetic modelling of iodine adsorption by **CTP1** (Gravimetric method) using pseudo-first-order kinetic model (left) and pseudo-second-order kinetic model (right)

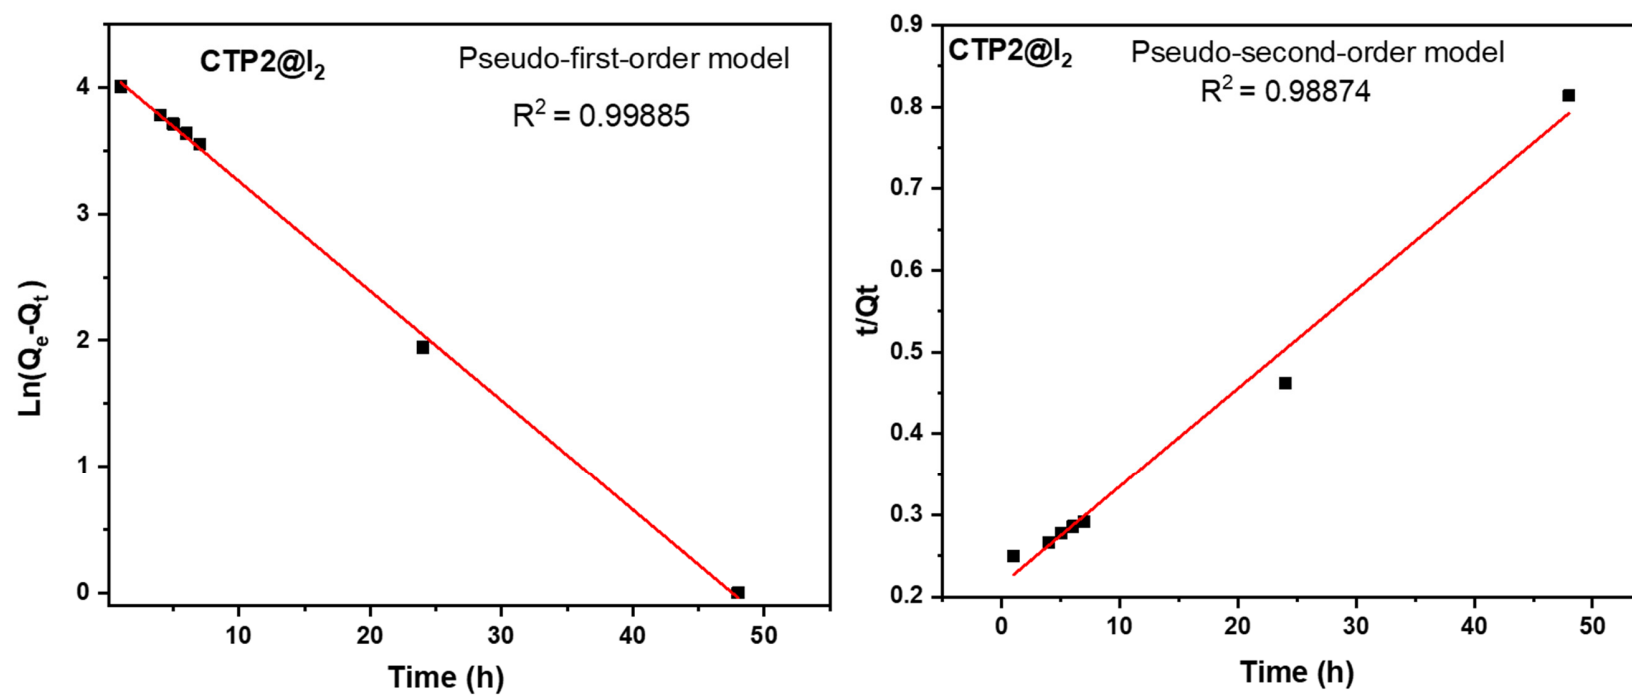

**Figure S23:** Kinetic modelling of iodine adsorption by **CTP2** (Gravimetric method) using pseudo-first-order kinetic model (left) and pseudo-second-order kinetic model (right)

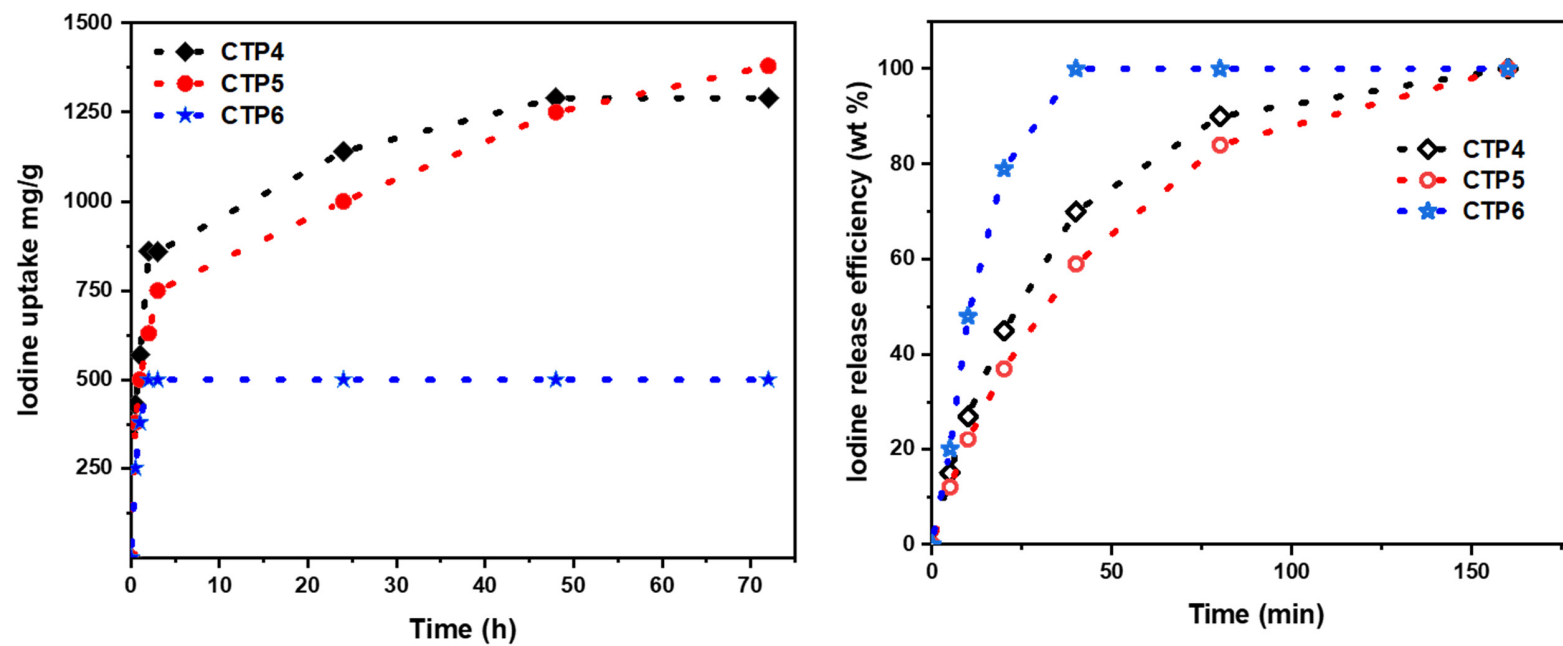

**Figure S24:** Gravimetric adsorption at 80°C (left) and desorption at 120°C (right) of iodine vapor
